# Supplementary material for: Dibujo II (Grupos A y C) Análise gráfica da arquitectura
Source: PLOS journal article supplement (doi:10.1371/journal.pcbi.1008197), 2000-01-01
Supplement: S8 (10.1371/journal.pcbi.1008197.s008) [file journal.pcbi.1008197.s008]

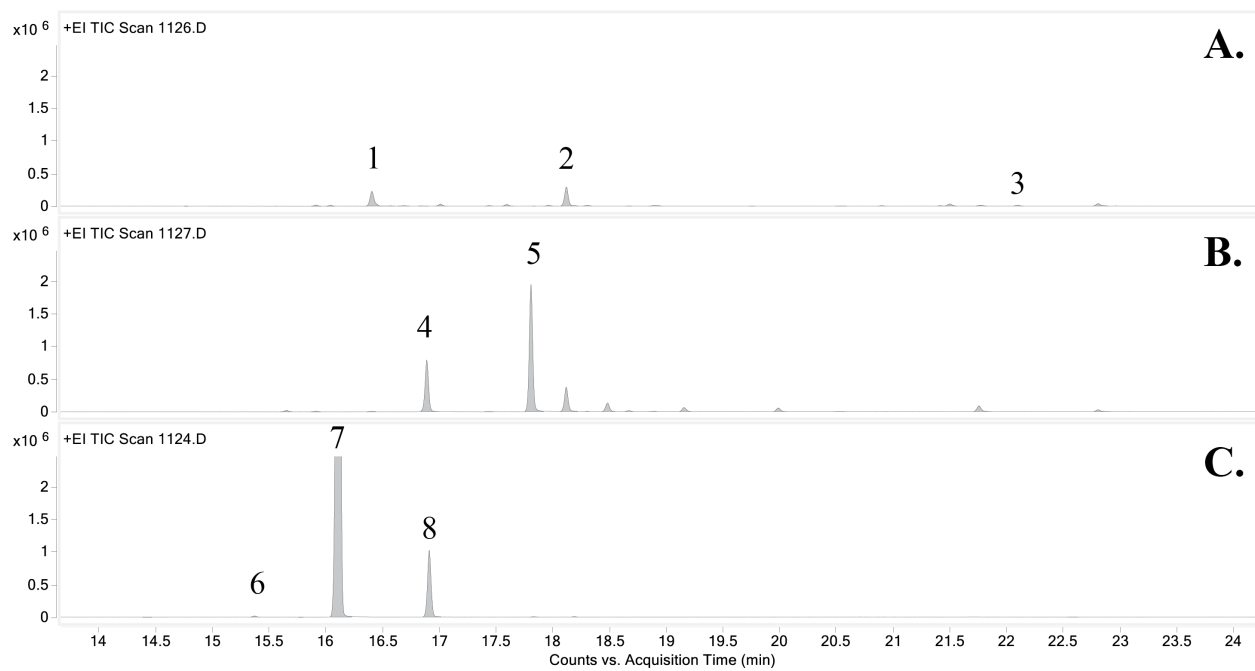

Figure S5: *Citrus bergamia* STS chromatograms Chromatograms obtained from the *R. sphaeroides* strain expressing **A.** MT636927, **B.** MT636928, and **C.** MW384854 with peaks labelled.
